# Supplementary material for: Prävention der exzessiven Mediennutzung im Kindes- und Jugendalter
Source: Springer Nature journal article supplement (doi:10.1007/s00112-021-01220-x), 2021-06-21
Supplement: MOESM1 [file 19278960]

## Studienvariablen

Detaillierte Darstellung der erfassten Merkmale:

Erfasst wurden das Alter, das Geschlecht (0 = Jungen, 1 = Mädchen), die Schulart (0 = kein Gymnasium, 1 = Gymnasium) sowie die Herkunft (0 = in Deutschland geboren, 1 = nicht in Deutschland geboren). Die subjektive Schulleistung wurde mit der Frage erfasst „Wie schätzt du deine Schulleistungen im Vergleich zu den Mitschüler\*innen deiner Klasse ein?“, Antwortmöglichkeiten waren „Viel besser/ Etwas besser/ Etwas gleich/ Etwas schlechter/ Viel schlechter“. Das Persönlichkeitsmerkmal „Sensation Seeking“ ist umschrieben als individuelle Tendenz, neue Erfahrungen zu machen und Eindrücke zu sammeln und hierfür unter Umständen Risiken in Kauf zu nehmen. Es wurde mit folgenden zwei Items ( $r = 0,72$ ,  $p < 0,001$ ) erfasst: „Wie oft machst du gefährliche Sachen, um Spaß zu haben?“ und „Wie oft machst du aufregende Sachen, auch wenn sie gefährlich sind?“. Die Antwortalternativen waren „Überhaupt nicht / Gelegentlich/ Manchmal/ Oft/ Sehr oft“. Die Persönlichkeitsstruktur wurde mittels des Big-Five-Inventory (BFI) erfasst. Es umfasst zehn Items, je zwei für die Offenheit, Verträglichkeit, Gewissenhaftigkeit, Extraversion und Neurotizismus. Der subjektive sozioökonomische Status wurde mit der 10-stufigen MacArthur Scale erfasst.[6] Dabei konnten sich die Befragten selbst auf der „sozialen Stufenleiter“ platzieren. („Stell dir eine Leiter mit zehn Sprossen vor, die zeigen soll, wo die Menschen in Deutschland stehen. Wo würdest du deine Familie auf dieser Leiter platzieren?“, 1 (unten) „Das wenigste Geld, die schlechtesten Jobs, die niedrigste Bildung“ bis 10 (oben) „Das meiste Geld, die besten Jobs, die höchste Bildung“).

Wissen zu negativen Folgen einer problematischen Mediennutzung wurde mittels der Frage „Was können gesundheitliche Folgen von übermäßigem Medienkonsum sein?“ erfasst. Antwortoptionen wie beispielsweise Schlafmangel, schlechte Körperhaltung standen zur Auswahl. Darüber hinaus wurde die Einstellung zum Thema Hilfe/Beratungsbereitschaft durch zwei Items erfasst: „Stell Dir vor, du wärst mediensüchtig (z. B. zu viel surfen im Internet, zu langes Computerspielen). Weißt du, an wen du dich wenden könntest, um Hilfe zu bekommen?“ und „Stell Dir vor, du wärst mediensüchtig (z. B. zu viel surfen im Internet, zu langes Computerspielen). Würdest Du jemand anderen um Hilfe bitten?“ (Antwortoptionen: Auf jeden Fall = 1, Eher ja = 2, Eher nein = 3, nein = 4). Das Wissen wurde darüber hinaus durch ein Wissensquiz mit drei Items zu den Bereichen Verbreitung, Suchtentwicklung und Rechtliches erfasst (z.B. „*Gelten mehr Mädchen oder Jungen in Deutschland als internetsüchtig?*“ Antwortoptionen „Mehr Mädchen“, „Mehr Jungen“, „Beide gleich“.).

Die Mediennutzungsdauer wurde in Stunden und Minuten für Computerspielen, Kommunikation über soziale Medien und Streaming an Schultagen und schulfreien Tagen erfasst. Folgende sechs Items wurden eingesetzt: „Wie viel Zeit verbringst du an einem gewöhnlichen Schultag (bzw. an einem schulfreien Tag (Wochenende, Ferien)) mit zocken (am Computer/Handy/Konsole)?“, „Wie viel Zeit verbringst du an einem gewöhnlichen Schultag (bzw. an einem schulfreien Tag (Wochenende, Ferien)) damit, mit anderen Personen über das Internet zu schreiben oder dich zu „unterhalten“ (z. B. über WhatsApp, Instagram, Twitter, Snapchat, Facebook, Messenger, E-Mail)?“, „Wie viel Zeit verbringst du an einem gewöhnlichen Schultag (bzw. an einem schulfreien Tag (Wochenende, Ferien)) damit, am Bildschirm zu lesen oder Filme zu schauen (z. B. über YouTube/Netflix/Amazon Prime)?“.

Das problematische Internetnutzungsverhalten wurde mittels der Compulsive Internet Use Scale (CIUS) erfasst.[9]
